# Supplementary material for: The effect of pulsed electromagnetic field exposure on osteoinduction of human mesenchymal stem cells cultured on nano-TiO2 surfaces
Source: PubMed Central journal article supplement (PMC6002089; doi:10.1371/journal.pone.0199046), 2018-06-14

S1 Fig.

**A**

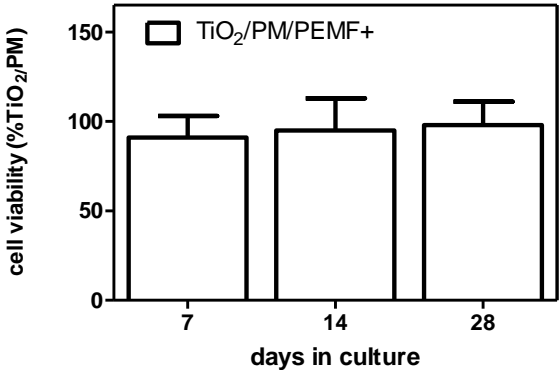

**B**

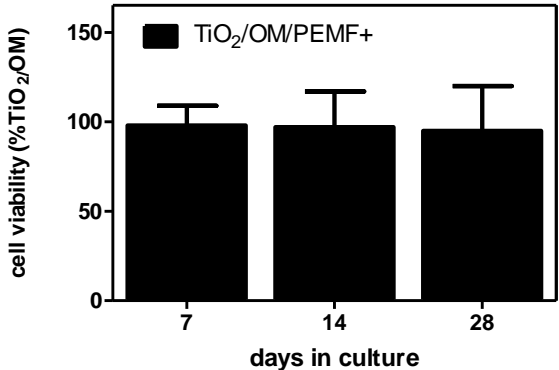

Supplement: pone.0199046.s001.pdf [file pone.0199046.s001.pdf]
