# Supplementary material for: The effect of pulsed electromagnetic field exposure on osteoinduction of human mesenchymal stem cells cultured on nano-TiO2 surfaces
Source: PubMed Central journal article supplement (PMC6002089; doi:10.1371/journal.pone.0199046), 2018-06-14
Supplement: pone.0199046.s002.pdf [file pone.0199046.s002.pdf]

**S1 Table.**

| <b>Genes</b>                                                                                                                                                                                                                                                                                                                                                                                                                 | <b>Upstream primer forward 5'- 3'</b> | <b>Downstream primer reverse 5'- 3'</b> | <b>Amplicon size (bp)</b> |
|------------------------------------------------------------------------------------------------------------------------------------------------------------------------------------------------------------------------------------------------------------------------------------------------------------------------------------------------------------------------------------------------------------------------------|---------------------------------------|-----------------------------------------|---------------------------|
| <b>ALP</b> <sup>a)</sup>                                                                                                                                                                                                                                                                                                                                                                                                     | CTA TCC TGG CTC CGT GTC C             | AGC CCA GAG ATG CAA TCG                 | 138                       |
| <b>BMP-2</b> <sup>b)</sup>                                                                                                                                                                                                                                                                                                                                                                                                   | CCT CCG TGG GGA TAG AAC TT            | CAC TGT GCG CAG CTT CC                  | 107                       |
| <b>BOSP</b> <sup>c)</sup>                                                                                                                                                                                                                                                                                                                                                                                                    | GGG CAG TAG TGA CTC ATC CG            | TCA GCC TCA GAG TCT TCA TCT TC          | 90                        |
| <b>COL-I</b> <sup>d)</sup>                                                                                                                                                                                                                                                                                                                                                                                                   | CAT GTT CAG CTT TGT GGA CC            | TTC TGT ACG CAG GTG ATT GG              | 128                       |
| <b>FN</b> <sup>e)</sup>                                                                                                                                                                                                                                                                                                                                                                                                      | ACC TCG GTG TTG TAA GGT GG            | CCA TAA AGG GCA ACC AAG AG              | 91                        |
| <b>GAPDH</b> <sup>f)</sup>                                                                                                                                                                                                                                                                                                                                                                                                   | AGC CTC AAG ATC ATC AGC AAT GCC       | TGT GGT CAT GAG TCC TTC CAC GAT         | 120                       |
| <b>RUNX-2</b> <sup>g)</sup>                                                                                                                                                                                                                                                                                                                                                                                                  | ACA GTA GAT GGA CCT CGG GA            | ATA CTG GGA TGA GGA ATG CG              | 113                       |
| <b>OSC</b> <sup>h)</sup>                                                                                                                                                                                                                                                                                                                                                                                                     | AAG AGA CCC AGG CGC TAC CT            | AAC TCG TCA CAG TCC GGA TTG             | 107                       |
| <b>OSX</b> <sup>i)</sup>                                                                                                                                                                                                                                                                                                                                                                                                     | CTC AGC TCT CTC CAT CTG CC            | GGG ACT GGA GCC ATA GTG AA              | 99                        |
| <p><sup>a)</sup>ALP, alkaline phosphatase; <sup>b)</sup>BMP-2, bone morphogenetic protein 2; <sup>c)</sup>BOSP, bone sialoprotein; <sup>d)</sup>COL-I, type-I collagen; <sup>e)</sup>FN, fibronectin; <sup>f)</sup>GAPDH, glyceraldehyde-3-phosphate dehydrogenase; <sup>g)</sup>RUNX-2, runt-related transcription factor 2; <sup>h)</sup>OSC, osteocalcin; <sup>i)</sup>OSX, osterix. GAPDH was the housekeeping gene.</p> |                                       |                                         |                           |
