# Supplementary material for: The effect of pulsed electromagnetic field exposure on osteoinduction of human mesenchymal stem cells cultured on nano-TiO2 surfaces
Source: PubMed Central journal article supplement (PMC6002089; doi:10.1371/journal.pone.0199046), 2018-06-14
Supplement: pone.0199046.s003.pdf [file pone.0199046.s003.pdf]

**S2 Table.**

| <b>Proteins</b> | <b>Proliferative medium</b> |                                |                  |
|-----------------|-----------------------------|--------------------------------|------------------|
|                 | <b>a)TiO<sub>2</sub></b>    | <b>b)TiO<sub>2</sub>/PEMF+</b> | <b>Ratio a/b</b> |
| <b>ALP</b>      | 6.2 ± 0,68                  | 6.8 ± 0,5                      | 1.1              |
| <b>COL-I</b>    | 35 ± 3.00                   | 40 ± 2.70                      | 1.1              |
| <b>COL-III</b>  | 36.7 ± 11                   | 39.5 ± 9                       | 1.0              |
| <b>DCN</b>      | 40.1 ± 2.4                  | 43.0 ± 1.6                     | 1.0              |
| <b>FN</b>       | 8.08 ± 1.01                 | 9.00 ± 2.00                    | 1.1              |
| <b>OPN</b>      | 20.07 ± 4,03                | 21.06 ± 2.07                   | 1.1              |
| <b>OSC</b>      | 1.4 ± 0.4                   | 1.7 ± 0.6                      | 1.2              |
| <b>OSN</b>      | 1.74 ± 0.33                 | 1.93 ± 0.55                    | 1.1              |
